# Supplementary material for: Fluorometric sensing of Pb2+and CrO42−ions through host–guest inclusion for human lung cancer live cell imaging
Source: Royal Society of Chemistry journal article supplement (doi:10.1039/c5ra17910f), 2015-01-01
Supplement: c5ra17910f1.pdf [file c5ra17910f1.pdf]

**Electronic Supplementary Information† (ESI†)**

**Fluorimetric sensing of Pb<sup>2+</sup> and CrO<sub>4</sub><sup>2-</sup> ions through host-guest inclusion for human lung cancer live cell imaging †**

S. Mohandoss<sup>a</sup>, J. Sivakamavalli<sup>b</sup>, B. Vaseeharan<sup>b</sup> and T. Stalin<sup>a\*</sup>

*<sup>a</sup>Department of Industrial Chemistry, School of Chemical Sciences, Alagappa University, Karaikudi- 630 003, Tamilnadu, India.*

*<sup>b</sup>Department of Animal Health and Management, Alagappa University, Karaikudi- 630 003, Tamilnadu, India.*

*\*Corresponding author (Dr. T. Stalin)*

*E-mail: tstalinphd@rediffmail.com, drstalin76@gmail.com; Mobile: +91 9944266475*

|    | <b>Contents</b>                                                                                  | <b>Page No.</b> |
|----|--------------------------------------------------------------------------------------------------|-----------------|
| 1  | <b>Figure S1:</b> Benesi-Hildebrand plot of inclusion complex                                    | <b>S3</b>       |
| 2  | <b>Figure S2:</b> Effect of cations in absorption and fluorescence spectra                       | <b>S4</b>       |
| 3  | <b>Figure S3:</b> Effect of anions in absorption and fluorescence spectra                        | <b>S5</b>       |
| 4  | <b>Figure S4:</b> Absorption spectra of <b>1</b> with the addition of $\text{Pb}^{2+}$ ion       | <b>S6</b>       |
| 5  | <b>Figure S5:</b> Job's plot between <b>2</b> and $\text{Pb}^{2+}$ ion                           | <b>S7</b>       |
| 6  | <b>Figure S6:</b> Fluorescence spectra of <b>1</b> with the addition of $\text{Pb}^{2+}$ ion     | <b>S8</b>       |
| 7  | <b>Figure S7:</b> Job's plot between <b>2</b> and $\text{Pb}^{2+}$ ion                           | <b>S9</b>       |
| 8  | <b>Figure S8:</b> Absorption spectra of <b>1</b> with the addition of $\text{CrO}_4^{2-}$ ion    | <b>S10</b>      |
| 9  | <b>Figure S9:</b> Job's plot between <b>2</b> and $\text{CrO}_4^{2-}$ ion                        | <b>S11</b>      |
| 10 | <b>Figure S10:</b> Fluorescence spectra of <b>1</b> with the addition of $\text{CrO}_4^{2-}$ ion | <b>S12</b>      |
| 11 | <b>Figure S11:</b> Job's plot between <b>2</b> and $\text{CrO}_4^{2-}$ ion                       | <b>S13</b>      |
| 12 | <b>Table S1</b> Spectral data of inclusion complex                                               | <b>S14</b>      |
| 13 | <b>Table S2</b> Molecular docking score                                                          | <b>S15</b>      |

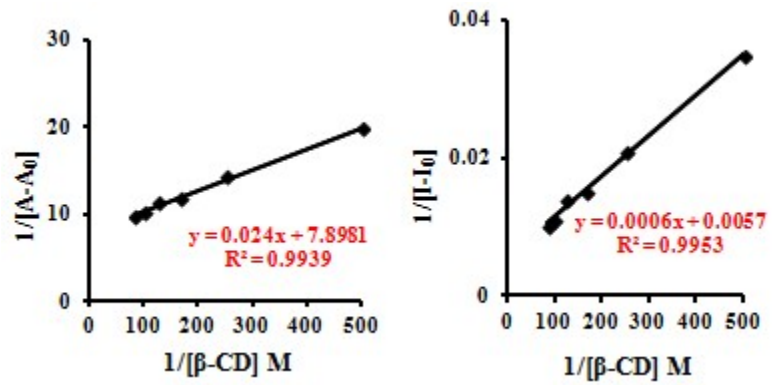

**Figure S1:** Benesi-Hildebrand plot of probe 2 (a)  $1/[A-A_0]$  vs.  $1/[\beta\text{-CD}]$  and (b)  $1/[I-I_0]$  vs.  $1/[\beta\text{-CD}]$ .

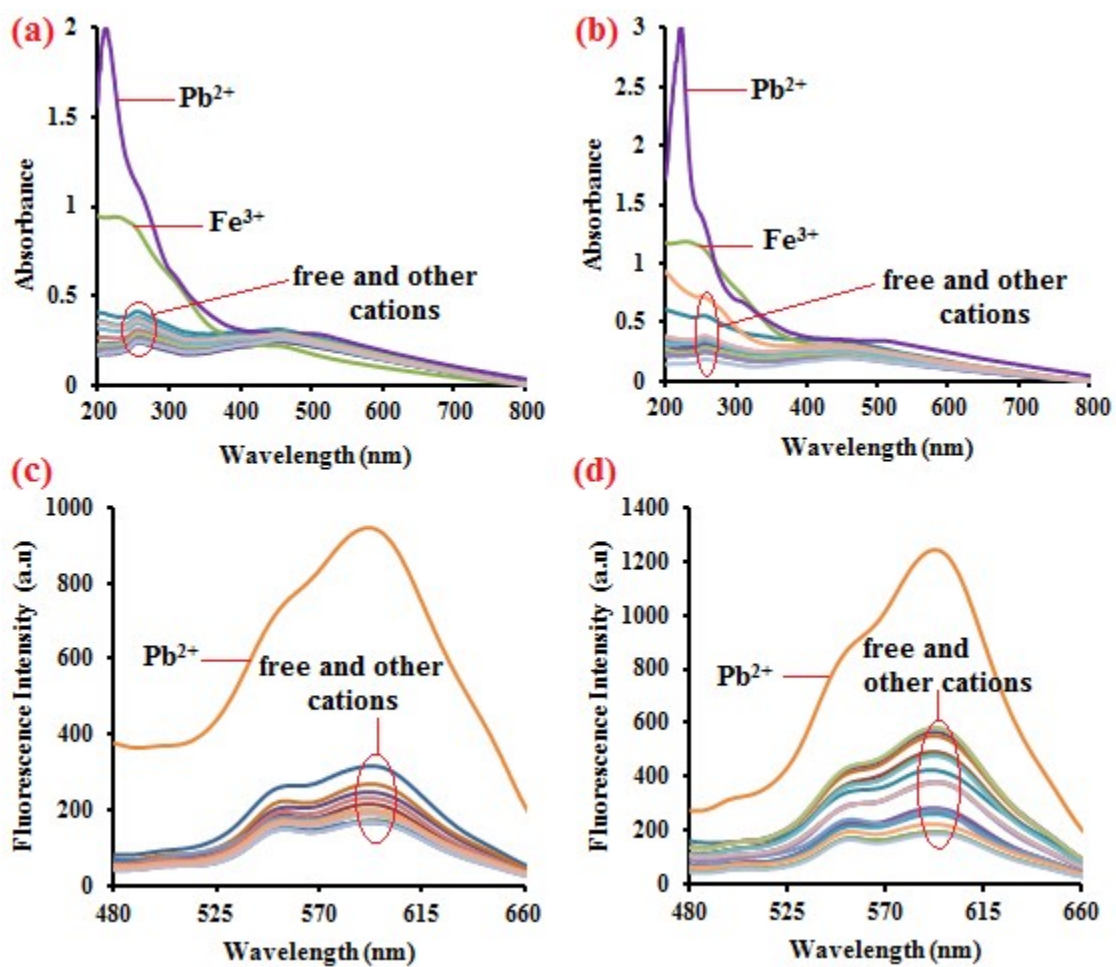

**Figure S2:** Absorption spectra of (a) **1** (b) **2** and fluorescence spectra of (c) **1** (d) **2** ( $1 \times 10^{-4}$  M,  $\beta$ -CD;  $1.2 \times 10^{-2}$  M) in pH~7.5 solution in presence of different cations ( $1 \times 10^{-4}$  M).

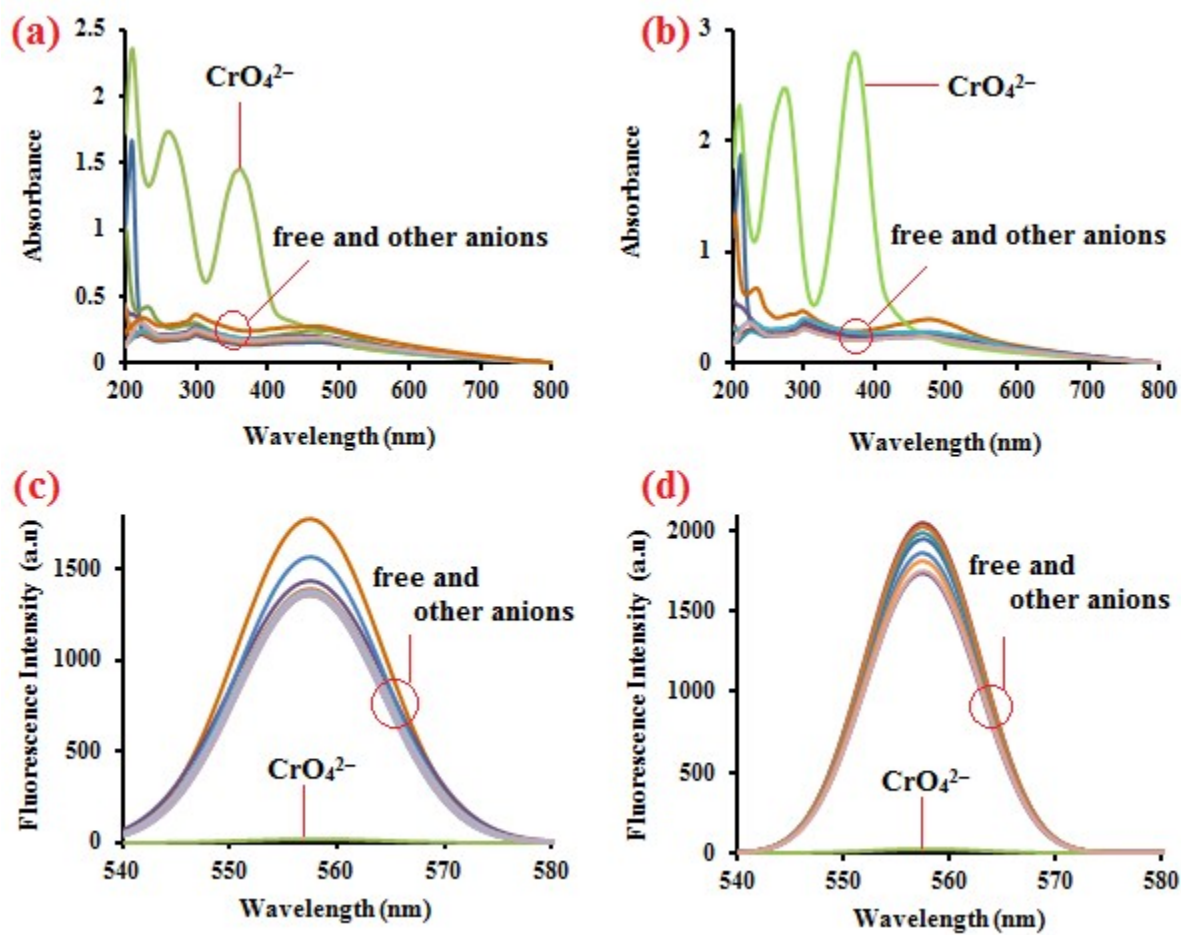

**Figure S3:** Absorption spectra of (a) **1** (b) **2** and fluorescence spectra of (c) **1** (d) **2** ( $1; 1 \times 10^{-4}$  M,  $\beta$ -CD;  $1.2 \times 10^{-2}$  M) in pH~7.5 solution in presence of different anions ( $1 \times 10^{-4}$  M).

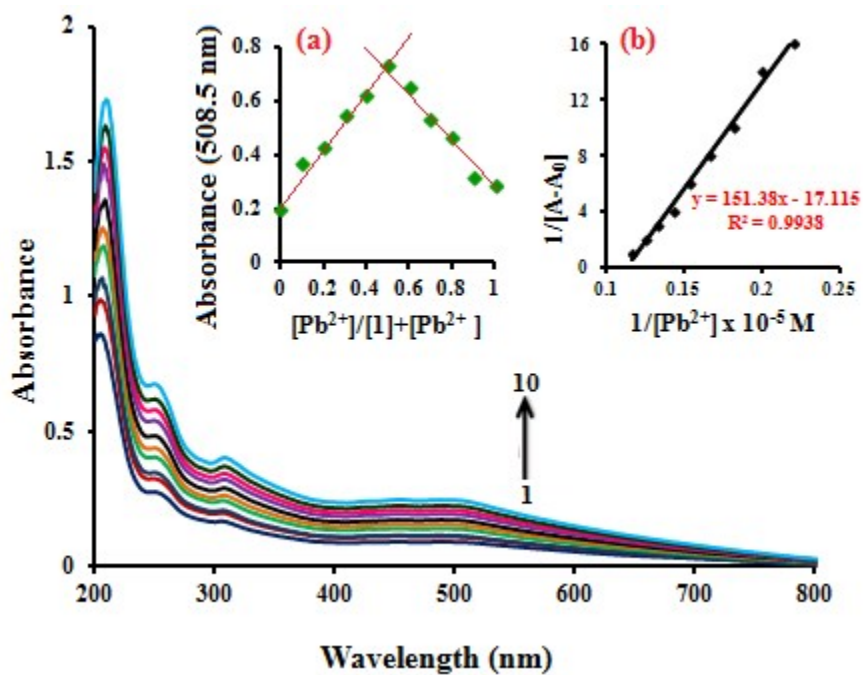

**Figure S4:** Absorption spectra of **1** ( $1 \times 10^{-4}$  M) with the addition of  $\text{Pb}^{2+}$  ion concentrations ( $4.0 \times 10^{-5}$  –  $8.5 \times 10^{-5}$  M). Inset figures (a) Job's plot analysis for the complexation between **1** and  $\text{Pb}^{2+}$  ion and (b) Benesi–Hildebrand plot of  $1/[A-A_0]$  vs.  $1/[\text{Pb}^{2+}]$ .

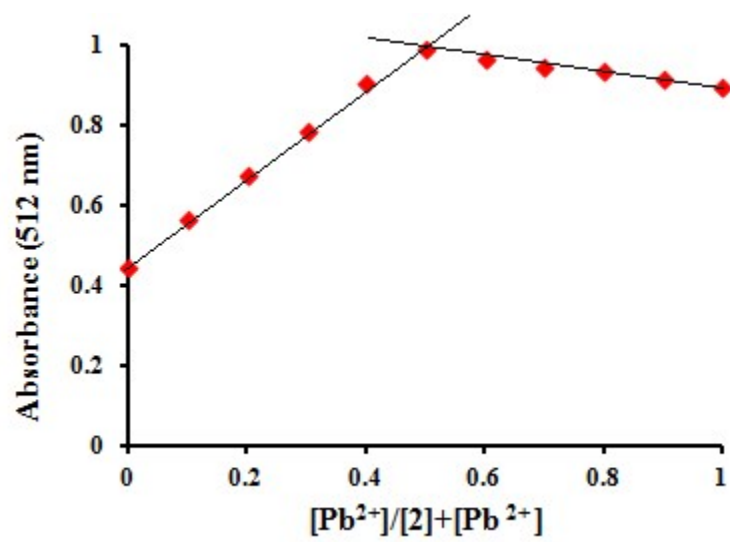

**Figure S5:** Job's plot analysis for the complexation between **2** and Pb<sup>2+</sup> ion.

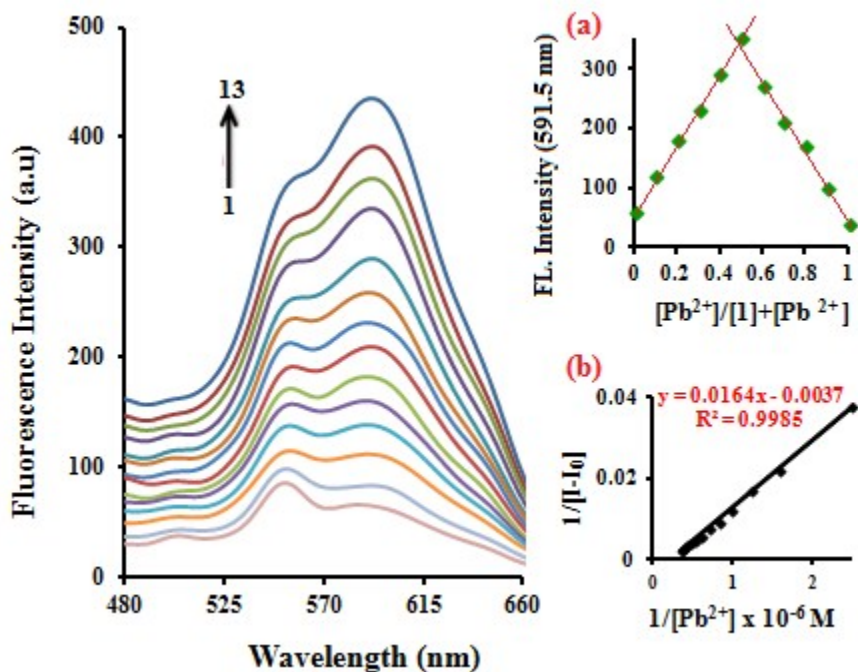

**Figure S6:** Fluorescence spectra of **1** ( $1.0 \times 10^{-4}$  M) with the addition of  $\text{Pb}^{2+}$  ion concentrations ( $0.2 \times 10^{-6}$  –  $2.8 \times 10^{-6}$  M). Inset figures (a) Job's plot analysis for the complexation between **1** and  $\text{Pb}^{2+}$  ion and (b) Benesi–Hildebrand plot of  $1/[I-I_0]$  vs.  $1/[\text{Pb}^{2+}]$ .



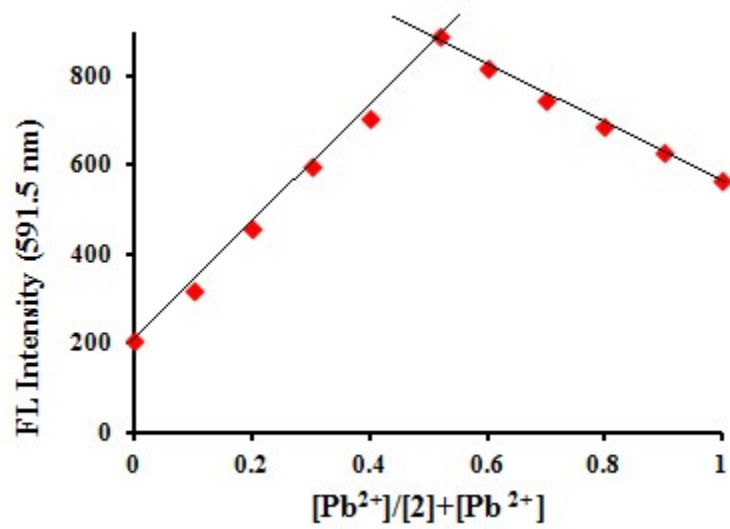

**Figure S7:** Job's plot analysis for the complexation between **2** and Pb<sup>2+</sup> ion.

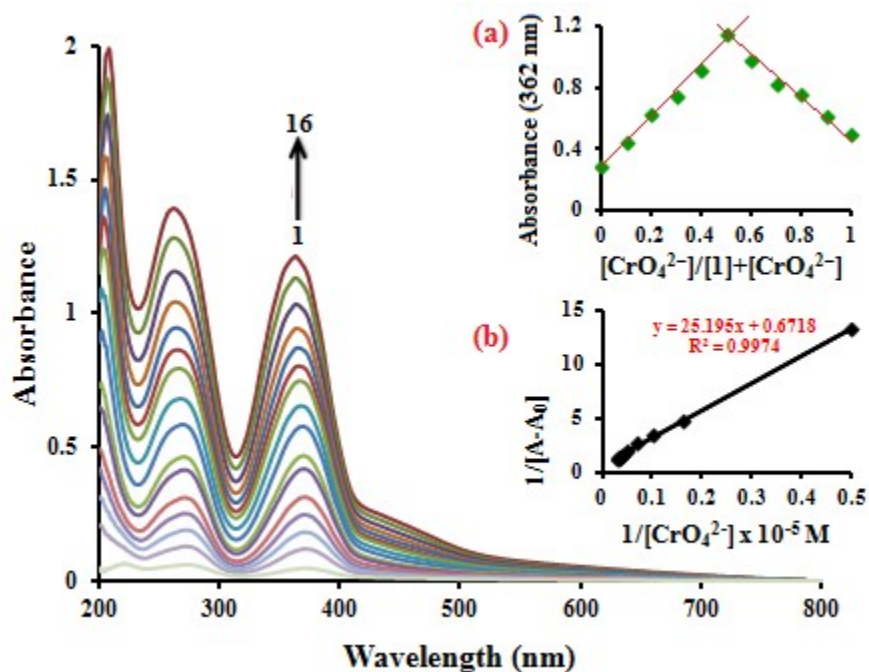

**Figure S8.** Absorption spectra of **1** ( $1 \times 10^{-4}$  M) with the addition of  $\text{CrO}_4^{2-}$  ion concentrations ( $2 \times 10^{-5}$  –  $32 \times 10^{-5}$  M). Inset figures (a) Job's plot analysis for the complexation between **1** and  $\text{CrO}_4^{2-}$  ion and (b) Benesi–Hildebrand plot of  $1/[A-A_0]$  vs.  $1/[\text{CrO}_4^{2-}]$ .

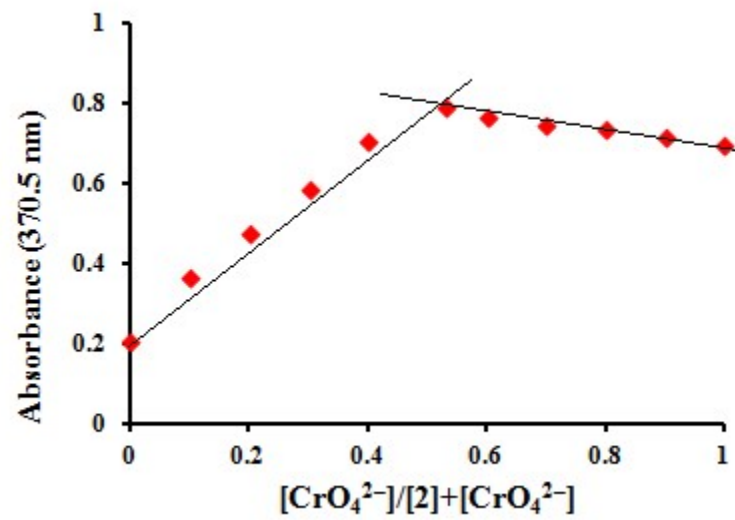

**Figure S9:** Job's plot analysis for the complexation between **2** and  $\text{CrO}_4^{2-}$  ion.

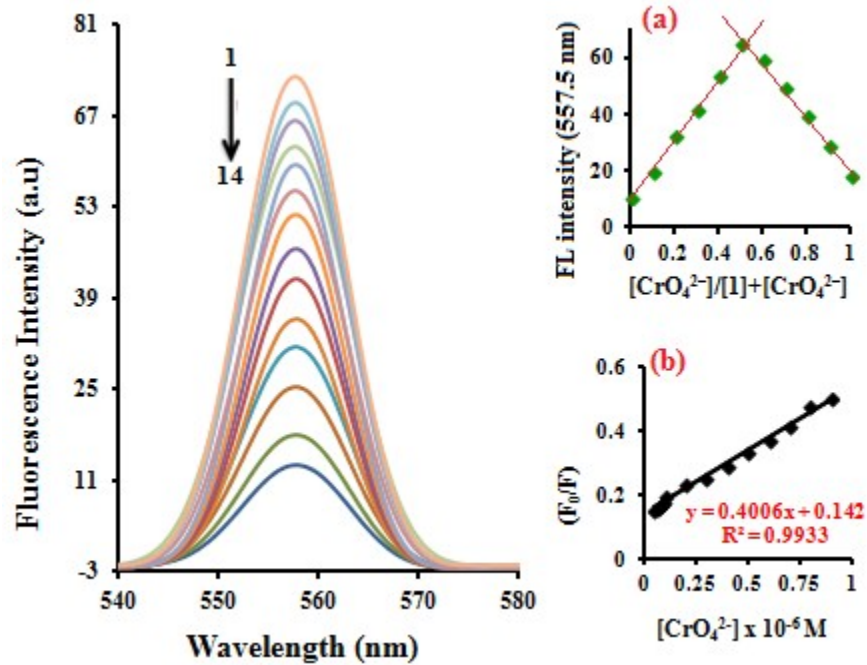

**Figure S10:** Fluorescence spectra of **1** ( $1 \times 10^{-4}$  M) with the addition of  $\text{CrO}_4^{2-}$  ion concentrations ( $0.5 \times 10^{-7} - 0.9 \times 10^{-6}$  M). Inset figures (a) Job's plot analysis for the complexation between **1** and  $\text{CrO}_4^{2-}$  ion and (b) Stern-Volmer plot of  $(F_0/F)$  vs  $[\text{CrO}_4^{2-}]$ .

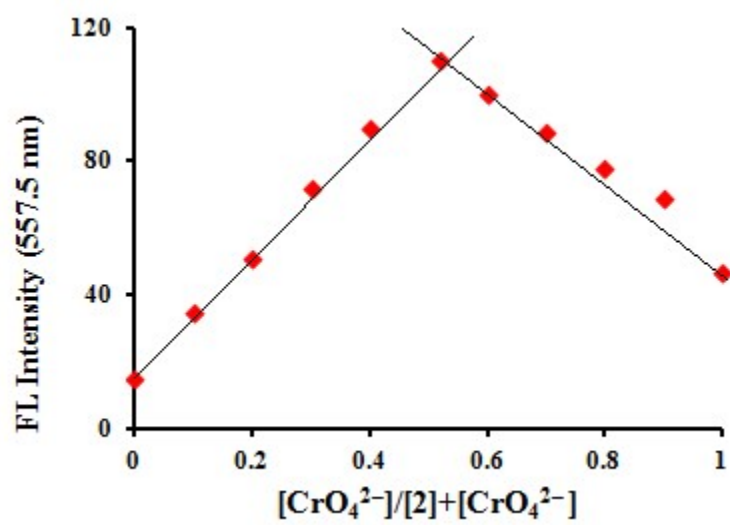

**Figure S11:** Job's plot analysis for the complexation between **2** and  $\text{CrO}_4^{2-}$  ion.

**Table S1.** Absorption and fluorescence maxima (nm) and log  $\epsilon$  of **1** at different concentrations of  $\beta$ -CD in pH~7.5 solution.

| S.No                          | Concentration of $\beta$ -CD (M) | pH~7.5                      |                |                             |
|-------------------------------|----------------------------------|-----------------------------|----------------|-----------------------------|
|                               |                                  | $\lambda_{\text{abs}}$ (nm) | log $\epsilon$ | $\lambda_{\text{flu}}$ (nm) |
| 1                             | 0<br>(Without $\beta$ -CD)       | 480.0                       | 3.79           | 591.0                       |
|                               |                                  | 298.5                       | 3.91           |                             |
|                               |                                  | 223.5                       | 3.84           |                             |
| 2                             | 0.002                            | 480.5                       | 3.83           | 591.5                       |
|                               |                                  | 298.0                       | 3.95           |                             |
|                               |                                  | 222.5                       | 3.90           |                             |
| 3                             | 0.004                            | 480.5                       | 3.84           | 591.5                       |
|                               |                                  | 298.0                       | 3.95           |                             |
|                               |                                  | 222.5                       | 3.91           |                             |
| 4                             | 0.006                            | 480.5                       | 3.84           | 591.5                       |
|                               |                                  | 298.0                       | 3.96           |                             |
|                               |                                  | 222.5                       | 3.92           |                             |
| 5                             | 0.008                            | 480.5                       | 3.85           | 591.5                       |
|                               |                                  | 298.0                       | 3.98           |                             |
|                               |                                  | 222.0                       | 3.93           |                             |
| 6                             | 0.010                            | 480.5                       | 3.86           | 591.5                       |
|                               |                                  | 298.0                       | 3.99           |                             |
|                               |                                  | 222.0                       | 3.97           |                             |
| 7                             | 0.012                            | 480.5                       | 3.87           | 591.5                       |
|                               |                                  | 298.0                       | 3.99           |                             |
|                               |                                  | 222.0                       | 4.00           |                             |
| Binding constant ( $M^{-1}$ ) |                                  | 361.27                      |                | 892.88                      |
| $\Delta G$ ( $kJ\ mol^{-1}$ ) |                                  | -14.83                      |                | -17.11                      |

**Table S2.** Computed using (i) PatchDock and (ii) FireDock server scores of the top 3 docked models of (A)  $1 \cdot \text{Pb}^{2+}$ , (B)  $1 \cdot \text{CrO}_4^{2-}$  (C) **2**, (D)  $2 \cdot \text{Pb}^{2+}$  and (E)  $2 \cdot \text{CrO}_4^{2-}$  complex.

| (i) Patchdock server |       |                    |                                        |                                           | (ii) FireDock server                      |                                            |                                           |                                           |
|----------------------|-------|--------------------|----------------------------------------|-------------------------------------------|-------------------------------------------|--------------------------------------------|-------------------------------------------|-------------------------------------------|
| Model                | S.No. | Score <sup>a</sup> | Area <sup>b</sup><br>(Å <sup>2</sup> ) | ACE <sub>1</sub> <sup>c</sup><br>kcal/mol | Global<br>Energy <sup>d</sup><br>kcal/mol | Attractive<br>VdW <sup>e</sup><br>kcal/mol | Repulsive<br>VdW <sup>e</sup><br>kcal/mol | ACE <sub>2</sub> <sup>f</sup><br>kcal/mol |
| A                    | 1     | 278                | 33.30                                  | -9.56                                     | 4.63                                      | -0.99                                      | 0.00                                      | -0.54                                     |
|                      | 2     | 266                | 29.50                                  | -9.56                                     | 5.05                                      | -1.27                                      | 0.09                                      | 0.74                                      |
|                      | 3     | 202                | 25.50                                  | 12.91                                     | 5.10                                      | -0.93                                      | 0.00                                      | -0.54                                     |
| B                    | 1     | 1142               | 131.60                                 | -25.64                                    | -3.80                                     | -3.58                                      | 0.02                                      | -1.43                                     |
|                      | 2     | 1126               | 122.70                                 | -23.80                                    | 0.70                                      | -2.64                                      | 0.00                                      | -1.24                                     |
|                      | 3     | 1002               | 112.50                                 | -23.08                                    | 0.83                                      | -3.00                                      | 0.00                                      | -1.33                                     |
| C                    | 1     | 3048               | 363.30                                 | -262.60                                   | -43.30                                    | -16.23                                     | 2.74                                      | -13.22                                    |
|                      | 2     | 3038               | 374.50                                 | -268.39                                   | -42.89                                    | -16.11                                     | 2.78                                      | -13.12                                    |
|                      | 3     | 2992               | 365.20                                 | -271.65                                   | -41.84                                    | -17.11                                     | 5.07                                      | -13.12                                    |
| D                    | 1     | 3158               | 384.50                                 | -245.55                                   | -41.62                                    | -18.86                                     | 6.40                                      | -11.70                                    |
|                      | 2     | 3040               | 383.40                                 | -243.83                                   | -41.17                                    | -16.87                                     | 2.61                                      | -11.67                                    |
|                      | 3     | 2994               | 364.40                                 | -244.30                                   | -40.98                                    | -17.41                                     | 3.76                                      | -11.97                                    |
| E                    | 1     | 3554               | 440.90                                 | -310.96                                   | -46.86                                    | -19.33                                     | 7.82                                      | -15.22                                    |
|                      | 2     | 3438               | 434.70                                 | -311.90                                   | -45.02                                    | -18.17                                     | 4.67                                      | -13.70                                    |
|                      | 3     | 3410               | 441.30                                 | -319.51                                   | -44.59                                    | -19.13                                     | 11.11                                     | -15.52                                    |

<sup>a</sup>Geometric shape complementarity score

<sup>b</sup>Approximate interface area size of the complex

<sup>c</sup>Atomic contact energy (ACE<sub>1</sub>)

<sup>d</sup>Indicating binding energy of the solution.

<sup>e</sup>Representing contribution of the van der Waals forces to the global binding energy.

<sup>f</sup>ACE<sub>2</sub> shows contribution of the atomic contact energy to the global binding energy.
